# Supplementary material for: A meteorological and blowing snow data set (2000–2016) from a high-elevation alpine site (Col du Lac Blanc, France, 2720 m a.s.l.)
Source: Copernicus journal article supplement (doi:10.5194/essd-11-57-2019), 2019-01-11
Supplement: Supplementary file 1 [file essd-11-57-2019-supplement.zip]

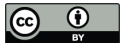

## *Supplement of*

# **A meteorological and blowing snow data set (2000–2016) from a high-elevation alpine site (Col du Lac Blanc, France, 2720 m a.s.l.)**

**G. Guyomarc’h et al.**

*Correspondence to:* Florence Naaim-Bouvet ([florence.naaim@univ-grenoble-alpes.fr](mailto:florence.naaim@univ-grenoble-alpes.fr))

- [essd-11-57-2019-supplement-title-page.pdf](#)
- [supf01.png](#)
- [supf02.png](#)
- [supf03.png](#)
- [supf04.png](#)
- [supf05.png](#)
- [supf06.png](#)
- [supf07.png](#)
- [supf08.png](#)
- [supf09.png](#)
- [supf10.png](#)
- [supf11.png](#)
- [supf12.png](#)
- [supf13.png](#)
- [supf14.png](#)
- [supf15.png](#)
- [supf16.png](#)

The copyright of individual parts of the supplement might differ from the CC BY 4.0 License.
